# Supplementary material for: Regioselective near-equatorial chlorination of Cs-C70(CF3)8
Source: Royal Society of Chemistry journal article supplement (doi:10.1039/c0nj00591f), 2010-10-08
Supplement: c0nj00591f.pdf [file c0nj00591f.pdf]

## ***Supporting Information***

for

# **Regioselective near-equatorial chlorination of $C_s-C_{70}(CF_3)_8$**

*A. A. Goryunkov, N. A. Samokhvalova, P. A. Khavrel, N. M. Belov, V. Yu. Markov,*

*L. N. Sidorov, and S. I. Troyanov*

*in*

***New Journal of Chemistry***

### **Table of contents**

|                                                                                                                                                                                                                                                                                                                              |    |
|------------------------------------------------------------------------------------------------------------------------------------------------------------------------------------------------------------------------------------------------------------------------------------------------------------------------------|----|
| <b>Table S1.</b> Schlegel diagrams, relative energies (at the DFT and AM1 levels of theory), and IUPAC lowest-locant indexes for isomers of $C_{70}(CF_3)_8Cl_2$ within 50 kJ mol <sup>-1</sup> DFT energy gap                                                                                                               | S2 |
| <b>Table S2.</b> Fragments of 3D projections of $C_{70}(CF_3)_8X_2$ , X=H, Cl, Br, CF <sub>3</sub> , their relative DFT energies (within full set of corresponding isomers); some X...X, CF <sub>2</sub> -F...X distances and C <sub>cage</sub> -C <sub>cage</sub> -C-F dihedral angles are given (DFT optimized geometries) | S4 |
| <b>Figure S1.</b> Top and side projections of probability isodensity surfaces (0.04) associated with HOMO (left) and LUMO (right) of $C_s-C_{70}(CF_3)_8$                                                                                                                                                                    | S5 |
| <b>Table S3.</b> Possible radical $C_{70}(CF_3)_8Cl\cdot$ intermediates within 40 kJ mol <sup>-1</sup> DFT energy gap                                                                                                                                                                                                        | S6 |
| <b>Figure S2.</b> Mulliken and Hirshfeld population analyzes (MPA and HPA) of cage carbon atoms of the most energetic preferable radical intermediate $C_{70}(CF_3)_8Cl\cdot$                                                                                                                                                | S8 |
| <b>Table S4.</b> Experimental and calculated <sup>19</sup> F NMR chemical shifts in $C_s-C_{70}(CF_3)_8$ and $C_s-C_{70}(CF_3)_8Cl_2$                                                                                                                                                                                        | S9 |

**Table S1.** Schlegel diagrams, relative energies (at the DFT and AM1 levels of theory), and IUPAC lowest-locant indexes for isomers of  $C_{70}(CF_3)_8Cl_2$  within 50 kJ mol<sup>-1</sup> DFT energy gap. Filled and empty circles denote site of addition  $CF_3$  groups and chlorine atoms

| <i>N</i> <sub>o</sub> | <i>Schlegel Diagrams of</i><br>$C_{70}(CF_3)_8Cl_2$                                 | $\Delta\Delta_f H_0^\circ$ kJ mol <sup>-1</sup> |            | <i>IUPAC name</i>                                                                  |
|-----------------------|-------------------------------------------------------------------------------------|-------------------------------------------------|------------|------------------------------------------------------------------------------------|
|                       |                                                                                     | <i>DFT</i>                                      | <i>AM1</i> |                                                                                    |
| 1                     | 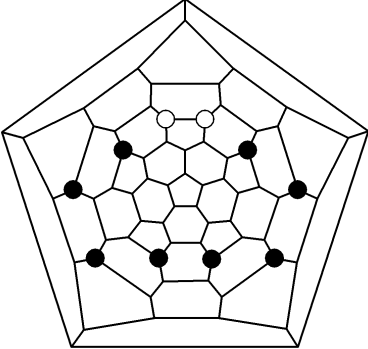   | 0.0                                             | 0.0        | 11,29-dichloro-<br>1,4,19,41,49,60,66,69-<br>octa(trifluoromethyl)-C <sub>70</sub> |
| 2                     |   | 24.8                                            | 11.9       | 49,66-dichloro-<br>1,4,11,19,31,41,60,69-<br>octa(trifluoromethyl)-C <sub>70</sub> |
| 3                     |  | 26.0                                            | 0.4        | 10,25-dichloro-<br>1,4,19,41,49,60,66,69-<br>octa(trifluoromethyl)-C <sub>70</sub> |

| <i>N</i> <sub>o</sub> | <i>Schlegel Diagrams of</i><br><i>C</i> <sub>70</sub> ( <i>CF</i> <sub>3</sub> ) <sub>8</sub> <i>Cl</i> <sub>2</sub> | $\Delta\Delta_f H_0^\circ \text{ kJ mol}^{-1}$ |            | <i>IUPAC name</i>                                                                  |
|-----------------------|----------------------------------------------------------------------------------------------------------------------|------------------------------------------------|------------|------------------------------------------------------------------------------------|
|                       |                                                                                                                      | <i>DFT</i>                                     | <i>AMI</i> |                                                                                    |
| 4                     | 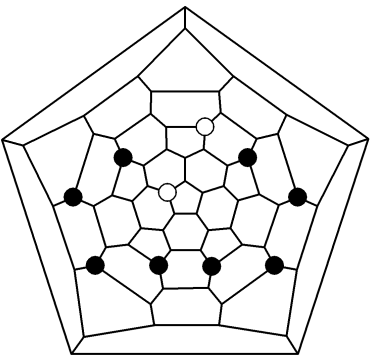                                    | 43.5                                           | 41.4       | 24, 61-dichloro-1, 4, 11, 19, 31, 41, 51, 64-octa(trifluoromethyl)-C <sub>70</sub> |
| 5                     |                                    | 47.1                                           | 19.2       | 46,47-dichloro-1,4,11,19,31,41,60,69-octa(trifluoromethyl)-C <sub>70</sub>         |
| 6                     |                                   | 47.6                                           | 40.8       | 8, 27-dichloro-1, 4, 19, 41, 49, 60, 66, 69-octa(trifluoromethyl)-C <sub>70</sub>  |

**Table S2.** Fragments of 3D projections of  $C_{70}(CF_3)_8X_2$ ,  $X=H, Cl, Br, CF_3$ , their relative DFT energies (within full set of corresponding isomers); some  $X...X$ ,  $CF_2-F...X$  distances and  $C_{cage}-C_{cage}-C-F$  dihedral angles are given (DFT optimized geometries)

| $C_{70}(CF_3)_8X_2$ , $X=$ | DFT $\Delta\Delta_f H_0^\circ$ $kJ\ mol^{-1}$ | Fragment of 3D Projection of $C_{70}(CF_3)_8X_2$                                     |
|----------------------------|-----------------------------------------------|--------------------------------------------------------------------------------------|
| H                          | 0.0                                           | 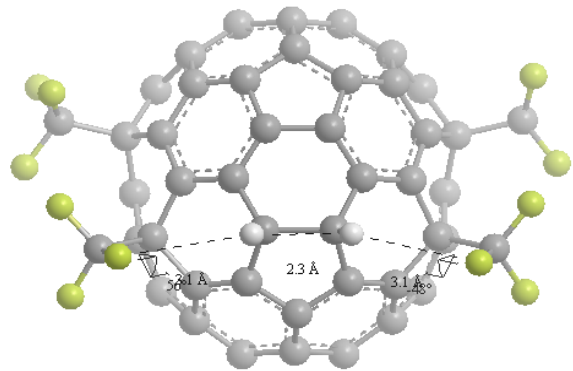   |
| Cl                         | 0.0                                           |   |
| Br                         | 0.0                                           |  |
| CF <sub>3</sub>            | 12.0                                          |  |

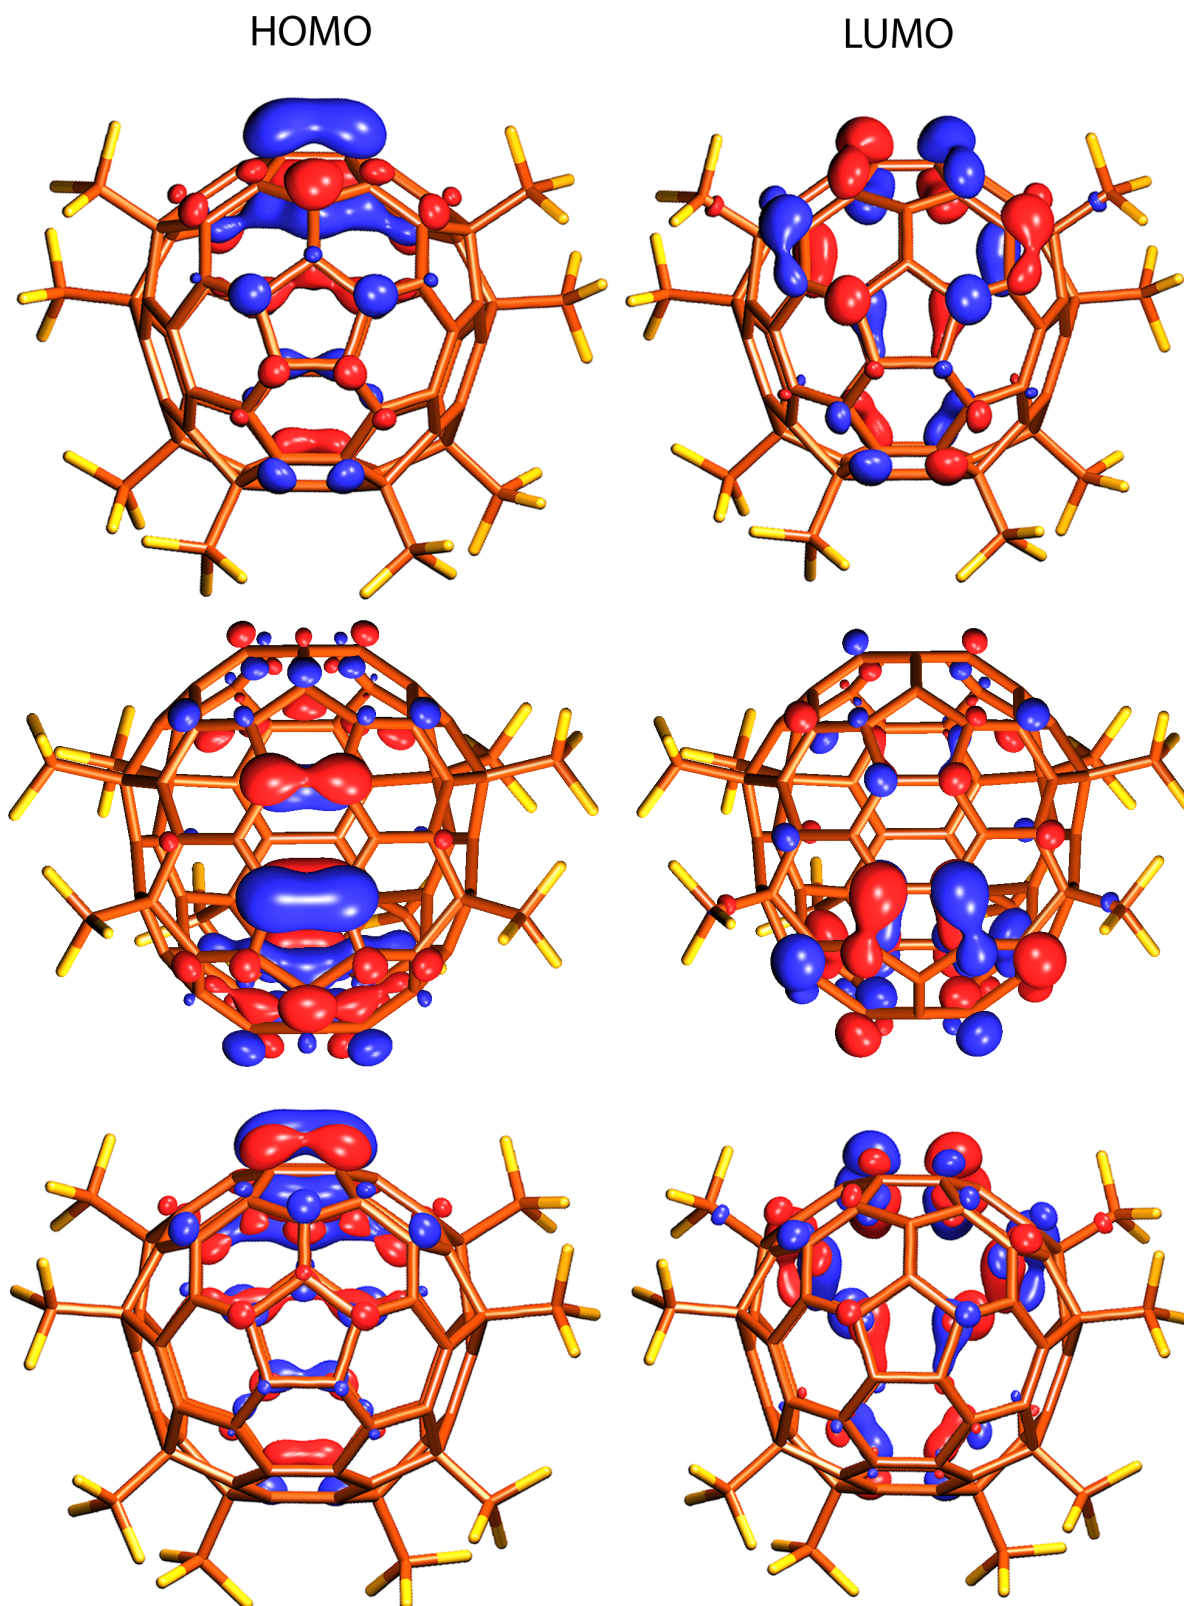

Figure S1. Top and side projections of probability isodensity surfaces (0.04) associated with HOMO (left) and LUMO (right) of  $C_5-C_{70}(CF_3)_8$

Table S3. Possible radical  $C_{70}(CF_3)_8Cl$  intermediates within 40  $\text{kJ mol}^{-1}$  DFT energy gap. Filled and empty circles denote sites of addition  $CF_3$  groups and chlorine atom

| $N^{\circ}$ | Schlegel diagrams of $C_{70}(CF_3)_8Cl$ intermediate | DFT $\Delta\Delta_f H^{\circ}$ , $\text{kJ mol}^{-1}$ | $N^{\circ}$ | Schlegel diagrams of $C_{70}(CF_3)_8Cl$ intermediate | DFT $\Delta\Delta_f H^{\circ}$ , $\text{kJ mol}^{-1}$ |
|-------------|------------------------------------------------------|-------------------------------------------------------|-------------|------------------------------------------------------|-------------------------------------------------------|
| 1           |                                                      | 0.0                                                   | 5           |                                                      | 29.3                                                  |
| 2           |                                                      | 15.1                                                  | 6           |                                                      | 29.3                                                  |
| 3           |                                                      | 25.3                                                  | 7           |                                                      | 29.7                                                  |
| 4           |                                                      | 28.1                                                  | 8           |                                                      | 30.0                                                  |

| $N_0$ | Schlegel diagrams of $C_{70}(CF_3)_8Cl$ intermediate | DFT $\Delta\Delta_f H_0^\circ$ , $kJ mol^{-1}$ | $N_0$ | Schlegel diagrams of $C_{70}(CF_3)_8Cl$ intermediate | DFT $\Delta\Delta_f H_0^\circ$ , $kJ mol^{-1}$ |
|-------|------------------------------------------------------|------------------------------------------------|-------|------------------------------------------------------|------------------------------------------------|
| 9     |                                                      | 30.5                                           | 13    |                                                      | 34.1                                           |
| 10    |                                                      | 31.3                                           | 14    |                                                      | 35.1                                           |
| 11    |                                                      | 33.2                                           | 15    |                                                      | 37.7                                           |
| 12    |                                                      | 33.3                                           | 16    |                                                      | 38.7                                           |

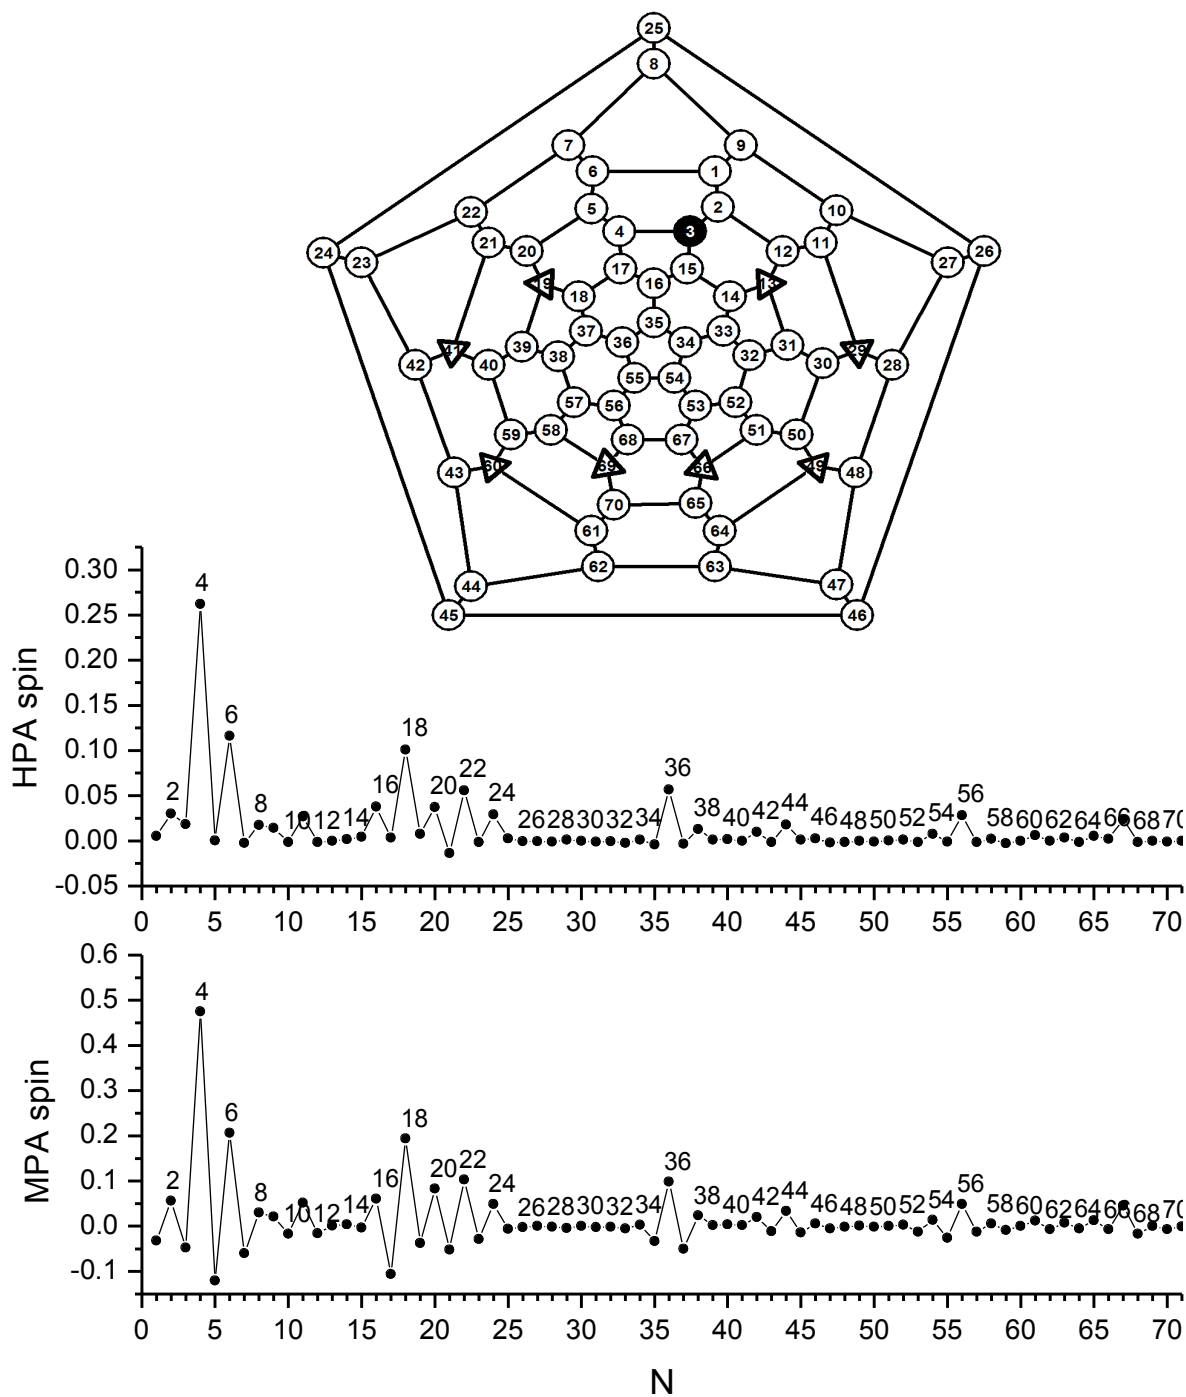

Figure S2. Mulliken and Hirshfeld population analyzes (MPA and HPA) of cage carbon atoms of the most energetic preferable radical intermediate  $C_{70}(CF_3)_8Cl$ . Triangles and black filled circle denote sites of addition  $CF_3$  groups and chlorine atom, correspondingly



Table S4. Experimental and calculated  $^{19}\text{F}$  NMR chemical shifts in  $\text{C}_5\text{-C}_{70}(\text{CF}_3)_8$  and  $\text{C}_5\text{-C}_{70}(\text{CF}_3)_8\text{Cl}_2$

| <i>Assigns</i>             | <i><math>^{19}\text{F}</math> NMR shifts -<math>\delta\text{F}</math>, ppm</i> |                    |                                                                        |                    |
|----------------------------|--------------------------------------------------------------------------------|--------------------|------------------------------------------------------------------------|--------------------|
|                            | <i><math>\text{C}_5\text{-C}_{70}(\text{CF}_3)_8</math></i>                    |                    | <i><math>\text{C}_5\text{-C}_{70}(\text{CF}_3)_8\text{Cl}_2</math></i> |                    |
|                            | <i>Experimental</i>                                                            | <i>Theoretical</i> | <i>Experimental</i>                                                    | <i>Theoretical</i> |
| Terminal $\text{CF}_3$     | 65.74                                                                          |                    | 62.36                                                                  |                    |
| Non terminal $\text{CF}_3$ | 61.68                                                                          | 59.16              | 61.67                                                                  | 61.11              |
|                            | 61.46                                                                          | 58.96              | 61.49                                                                  | 60.80              |
|                            | 61.40                                                                          | 58.47              | 61.44                                                                  | 60.68              |

<sup>a</sup> To bring theoretical scale in correspondence with the experimental one, quartets' positions in calculated spectra were set to those in experimental spectra.
